# Supplementary material for: DFT characterization on the mechanism of sulfoxidation with H2O2catalyzed by tetranuclear peroxotungstates [XO4{WO(O2)2}4]n−(X = SiIV, PV, SVI, AsV, and SeVI)
Source: Royal Society of Chemistry journal article supplement (doi:10.1039/c5dt00318k), 2015-01-01
Supplement: c5dt00318k1.pdf [file c5dt00318k1.pdf]

## Electronic Supplementary Information

### **DFT characterization on the mechanism of sulfoxidation with H<sub>2</sub>O<sub>2</sub> catalyzed by tetranuclear peroxotungstates [XO<sub>4</sub>{WO(O<sub>2</sub>)<sub>2</sub>}]<sub>4</sub><sup>n-</sup> (X = Si<sup>IV</sup>, P<sup>V</sup>, S<sup>VI</sup>, As<sup>V</sup>, and Se<sup>VI</sup>)**

Bo Zhu, Li-Kai Yan\*, Wei Guan\* and Zhong-Min Su\*

*Institute of Functional Material Chemistry, Faculty of Chemistry, Northeast Normal University, Changchun 130024, P. R. China; E-mail: [yanlk924@nenu.edu.cn](mailto:yanlk924@nenu.edu.cn); [guanw580@nenu.edu.cn](mailto:guanw580@nenu.edu.cn); [zmsu@nenu.edu.cn](mailto:zmsu@nenu.edu.cn)*

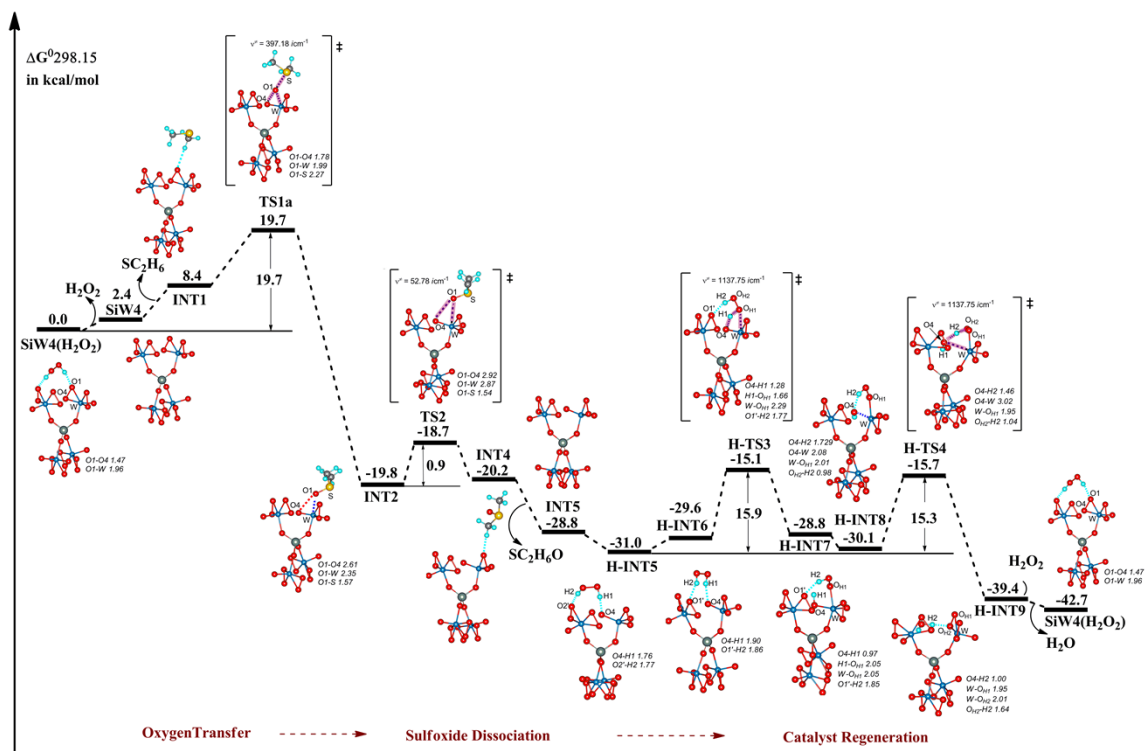

Fig. S1 Energy profiles ( $\Delta G^{\circ}_{298.15}$ ) of the catalytic cycle of  $\text{SiW}_4$  catalyzed reaction.

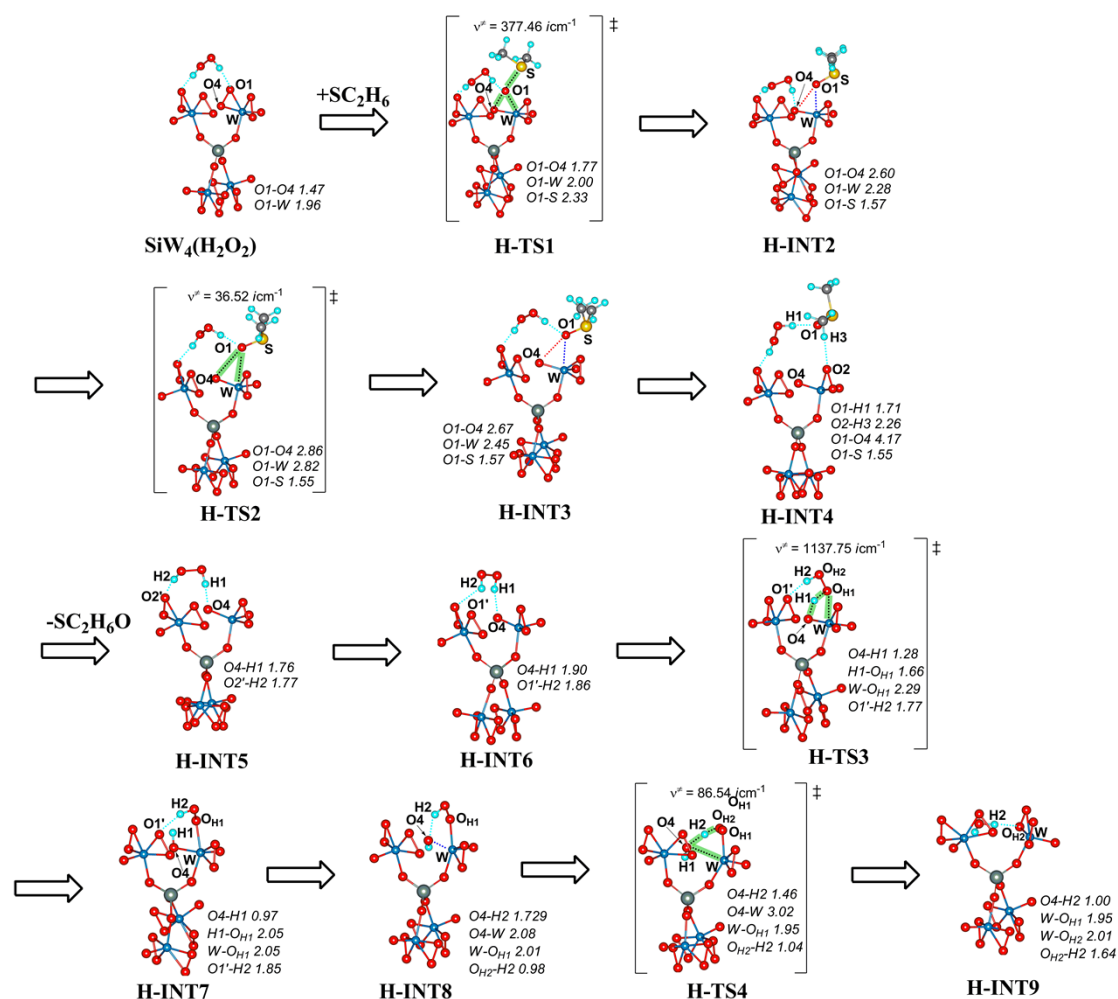

**Fig. S2** Optimized structures and selected geometrical parameters (bond lengths in angstroms) of stationary points in **Fig. 1**.

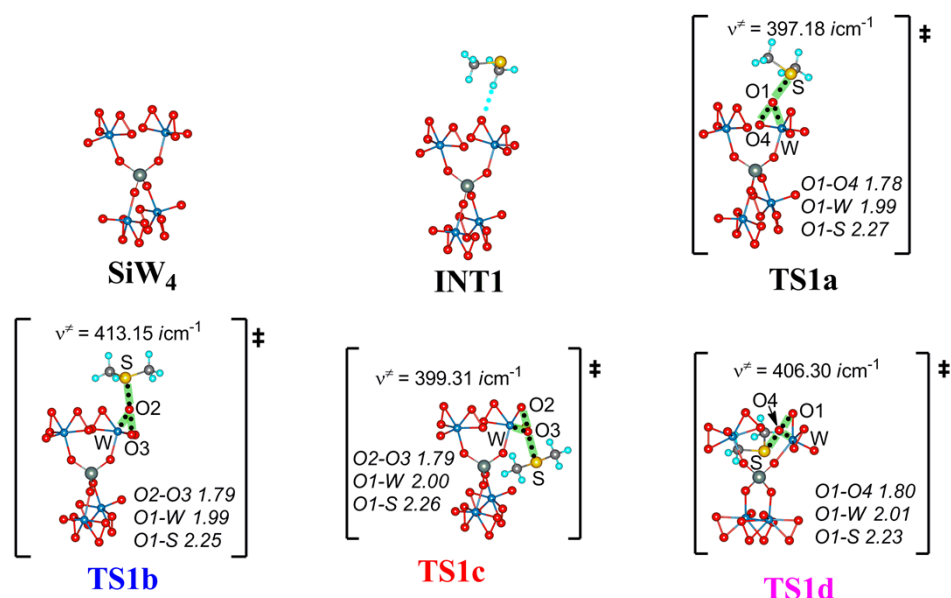

**Fig. S3** Optimized structures and selected geometrical parameters (bond lengths in angstroms) of stationary points in **Fig. 2**.

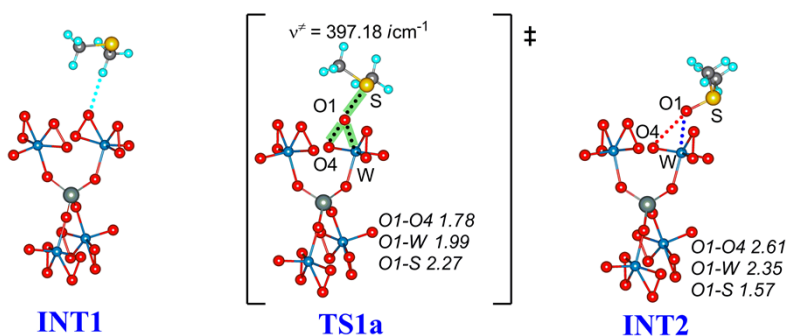

**Fig. S4** Optimized structures and selected geometrical parameters (bond lengths in angstroms) of stationary points in **Fig. 3**.

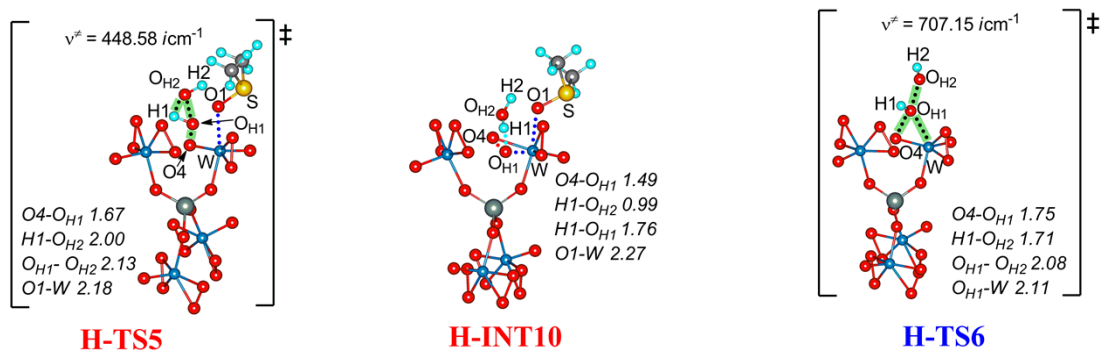

**Fig. S5** Optimized structures and selected geometrical parameters (bond lengths in angstroms) of stationary points in **Fig. 4**.

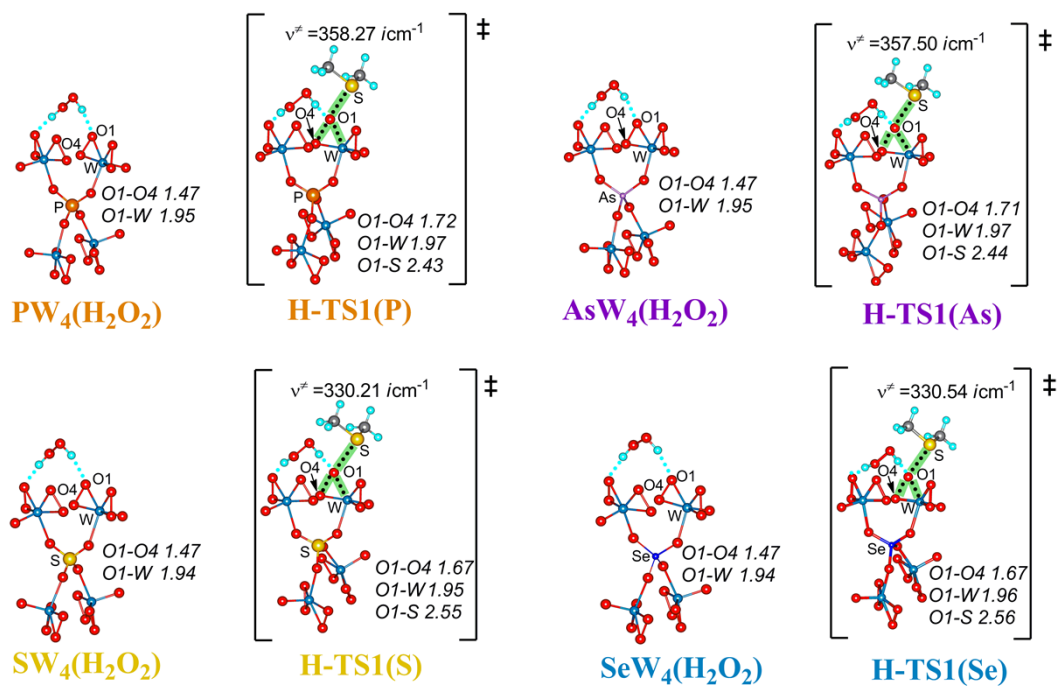

**Fig. S6** Optimized structures and selected geometrical parameters (bond lengths in angstroms) of stationary points in **Fig. 5**.

**Table S1** The natural charge of **WO<sub>5</sub>** group and the outer peroxy atoms (**O1-O4**) of tetranuclear peroxotungstates  $[\text{XO}_4\{\text{WO}(\text{O}_2)_2\}_4]^{n-}$  (X = Si<sup>IV</sup>, P<sup>V</sup>, As<sup>V</sup>, S<sup>VI</sup> and Se<sup>VI</sup>).

|                        | <b>WO<sub>5</sub></b> | <b>O1</b> | <b>O2</b> | <b>O3</b> | <b>O4</b> |
|------------------------|-----------------------|-----------|-----------|-----------|-----------|
| <b>SiW<sub>4</sub></b> | -0.567                | -0.422    | -0.464    | -0.437    | -0.419    |
| <b>PW<sub>4</sub></b>  | -0.422                | -0.386    | -0.420    | -0.411    | -0.416    |
| <b>AsW<sub>4</sub></b> | -0.427                | -0.384    | -0.418    | -0.412    | -0.421    |
| <b>SW<sub>4</sub></b>  | -0.302                | -0.350    | -0.374    | -0.388    | -0.417    |
| <b>SeW<sub>4</sub></b> | -0.305                | -0.348    | -0.372    | -0.388    | -0.422    |

**Table S2** The calculated condensed Fukui function ( $f^+$ ) of the outer peroxy atoms (**O1-O4**) of tetranuclear peroxotungstates  $[\text{XO}_4\{\text{WO}(\text{O}_2)_2\}_4]^{n-}$  (X = Si<sup>IV</sup>, P<sup>V</sup>, As<sup>V</sup>, S<sup>VI</sup> and Se<sup>VI</sup>).

|                        | <b>O1</b> | <b>O2</b> | <b>O3</b> | <b>O4</b> |
|------------------------|-----------|-----------|-----------|-----------|
| <b>SiW<sub>4</sub></b> | 0.063     | 0.054     | 0.053     | 0.032     |
| <b>PW<sub>4</sub></b>  | 0.069     | 0.047     | 0.060     | 0.025     |
| <b>AsW<sub>4</sub></b> | 0.066     | 0.048     | 0.058     | 0.027     |
| <b>SW<sub>4</sub></b>  | 0.072     | 0.043     | 0.066     | 0.020     |
| <b>SeW<sub>4</sub></b> | 0.070     | 0.0433    | 0.064     | 0.021     |

## Optimized Cartesian Coordinates

### SiW<sub>4</sub>(H<sub>2</sub>O)<sub>2</sub>

|    |             |             |             |
|----|-------------|-------------|-------------|
| O  | -1.11359900 | -0.98358400 | -0.93667000 |
| O  | -2.64753200 | -3.30681000 | -0.72892000 |
| O  | -2.86422800 | -1.42734900 | -2.92668600 |
| O  | -4.25256500 | -1.64325500 | -2.44818100 |
| O  | -4.46520700 | -1.38823000 | 0.23604200  |
| O  | -3.23667100 | -0.89831400 | 0.88362800  |
| O  | -1.21552000 | 0.96397700  | 0.89293900  |
| O  | -2.78702400 | 3.24758100  | 0.54533800  |
| O  | -3.13249400 | 1.36557000  | 2.72616000  |
| O  | -4.48172400 | 1.54696300  | 2.13548300  |
| O  | -4.46892600 | 1.27803100  | -0.55499200 |
| O  | -3.17938500 | 0.82274100  | -1.10053900 |
| O  | 0.80257600  | 0.88329400  | -0.90879700 |
| W  | -2.96008600 | -1.63402200 | -0.98585100 |
| W  | -3.07407500 | 1.56755600  | 0.78322400  |
| O  | 0.70016400  | -0.89995100 | 1.07129800  |
| O  | 2.35665400  | -3.13742600 | 1.18732000  |
| O  | 2.34242200  | -1.03640300 | 3.18304000  |
| O  | 3.76460300  | -1.21999800 | 2.80400000  |
| O  | 4.12679100  | -1.23177900 | 0.11746900  |
| O  | 2.91575900  | -0.87266200 | -0.64032100 |
| O  | 2.24115000  | 3.26708800  | -0.73601300 |
| O  | 2.76800500  | 1.20097000  | -2.70619300 |
| O  | 4.08333900  | 1.53542400  | -2.10789500 |
| O  | 3.96182400  | 1.48612000  | 0.60769800  |
| O  | 2.67165800  | 1.03380300  | 1.15193700  |
| W  | 2.56125900  | -1.43382500 | 1.28537500  |
| W  | 2.61123200  | 1.59061800  | -0.79447300 |
| Si | -0.21338300 | -0.01056600 | 0.03149100  |
| O  | 6.39594700  | -0.69744000 | -1.38619200 |
| O  | 5.70816500  | -0.60535600 | -2.66787200 |
| H  | 5.13196700  | 0.18617400  | -2.52339200 |
| H  | 5.66554400  | -0.98638700 | -0.79450100 |

### H-TS1

|   |             |             |             |
|---|-------------|-------------|-------------|
| O | -1.28657100 | 0.94607600  | 0.72628800  |
| O | -2.43687600 | 3.48122500  | 0.53986400  |
| O | -2.79094800 | 1.71289100  | 2.81344900  |
| O | -4.15674400 | 2.14265400  | 2.42265600  |
| O | -4.60508300 | 1.85985100  | -0.22663700 |
| O | -3.52257200 | 1.16735900  | -0.94587100 |
| O | -1.82552100 | -0.98512900 | -1.03433000 |
| O | -3.70505400 | -2.98449600 | -0.51140200 |
| O | -3.90694700 | -1.11865300 | -2.72348800 |
| O | -5.22149600 | -1.06701200 | -2.03659700 |
| O | -4.97474900 | -0.75239500 | 0.63699700  |
| O | -3.59438200 | -0.49796200 | 1.08298200  |
| O | 0.18387100  | -1.30359900 | 0.73240600  |
| W | -2.99123500 | 1.88637200  | 0.87635200  |
| W | -3.74070000 | -1.28449300 | -0.78237300 |
| O | 0.43959700  | 0.41120500  | -1.29629500 |
| O | 2.21233400  | 2.52926400  | -1.45865700 |
| O | 2.21059600  | 0.16776600  | -3.18103100 |
| O | 3.61067500  | 0.39033700  | -2.77213200 |

|    |             |             |             |
|----|-------------|-------------|-------------|
| O  | 3.96011800  | 0.76837600  | -0.12465400 |
| O  | 2.38016700  | 0.40623500  | 0.58415400  |
| O  | 1.65640500  | -3.60027300 | 1.12709400  |
| O  | 1.82030400  | -1.32158000 | 2.86726100  |
| O  | 3.23063200  | -1.66252200 | 2.54741100  |
| O  | 3.56832200  | -2.03528800 | -0.16437500 |
| O  | 2.38668800  | -1.68533600 | -0.97088800 |
| W  | 2.36539800  | 0.81595600  | -1.32894900 |
| W  | 2.01255200  | -1.91870600 | 1.00861200  |
| Si | -0.61543900 | -0.22424300 | -0.21769700 |
| C  | 7.00586300  | 0.11216500  | -0.19346000 |
| H  | 6.68620000  | 0.08086600  | 0.85040900  |
| H  | 8.06235100  | 0.38291600  | -0.26327700 |
| H  | 6.84849800  | -0.86305200 | -0.65764500 |
| S  | 5.99897300  | 1.31151800  | -1.12124600 |
| C  | 6.37677800  | 2.84478400  | -0.21387800 |
| H  | 5.78071300  | 3.63945200  | -0.66662400 |
| H  | 6.11284100  | 2.74191800  | 0.84095600  |
| H  | 7.43847600  | 3.08365000  | -0.31622100 |
| O  | 5.00171800  | 1.13995000  | 2.39081100  |
| O  | 4.03645100  | 0.81790200  | 3.43192400  |
| H  | 3.77430000  | -0.09866900 | 3.17308600  |
| H  | 4.46080000  | 1.09603000  | 1.56594300  |

#### H-INT2

|    |             |             |             |
|----|-------------|-------------|-------------|
| O  | -1.21796400 | 0.76582200  | 0.81086700  |
| O  | -2.14161200 | 3.39736700  | 0.86641800  |
| O  | -2.75219300 | 1.43550500  | 2.91344300  |
| O  | -4.05752700 | 2.02083200  | 2.51713500  |
| O  | -4.39259200 | 2.06470500  | -0.16701300 |
| O  | -3.33668400 | 1.35515500  | -0.90960400 |
| O  | -1.83093900 | -0.92932700 | -1.15383900 |
| O  | -3.89894000 | -2.78919300 | -0.93192600 |
| O  | -3.82597700 | -0.69579800 | -2.93687400 |
| O  | -5.16420000 | -0.59421700 | -2.30247000 |
| O  | -5.02545900 | -0.58156900 | 0.39712600  |
| O  | -3.65274100 | -0.49993200 | 0.92458700  |
| O  | 0.12225400  | -1.55885900 | 0.57826600  |
| W  | -2.84056500 | 1.82897700  | 0.99975900  |
| W  | -3.77048700 | -1.07397300 | -1.01866200 |
| O  | 0.50263500  | 0.35945700  | -1.25670000 |
| O  | 2.34058300  | 2.37065000  | -1.26471600 |
| O  | 2.29851100  | -0.06682900 | -2.98857300 |
| O  | 3.68166700  | 0.11377500  | -2.56084200 |
| O  | 4.57799600  | 1.06838100  | -0.39179900 |
| O  | 2.37357400  | 0.16158500  | 0.64699800  |
| O  | 1.63271100  | -3.76418400 | 1.18169500  |
| O  | 1.52014100  | -1.48316900 | 2.89990500  |
| O  | 2.96757000  | -1.78273700 | 2.74612300  |
| O  | 3.62593900  | -2.17741900 | 0.06569100  |
| O  | 2.51047100  | -1.91296400 | -0.86318100 |
| W  | 2.45408300  | 0.64531400  | -1.13076400 |
| W  | 1.94509200  | -2.06885000 | 1.07273700  |
| Si | -0.58689900 | -0.32941000 | -0.25098900 |
| C  | 6.86970900  | 0.93636900  | -1.76537400 |
| H  | 7.27621000  | 0.41725600  | -0.89498500 |
| H  | 7.63136300  | 1.55214800  | -2.24982400 |

|   |            |             |             |
|---|------------|-------------|-------------|
| H | 6.44623500 | 0.22840900  | -2.47878300 |
| S | 5.50657800 | 2.01303900  | -1.23782900 |
| C | 6.36834700 | 2.98527000  | 0.02790900  |
| H | 5.62666600 | 3.64272500  | 0.48312800  |
| H | 6.79648100 | 2.31133100  | 0.77219100  |
| H | 7.14345800 | 3.57766400  | -0.46422200 |
| O | 4.22060000 | 1.17312900  | 2.43405100  |
| O | 3.48467800 | 0.78553000  | 3.63331600  |
| H | 3.34285400 | -0.17379700 | 3.45767600  |
| H | 3.59856200 | 0.90334600  | 1.70693000  |

### H-INT3

|    |             |             |             |
|----|-------------|-------------|-------------|
| O  | 1.43678300  | -0.72636200 | 1.15857100  |
| O  | 2.56738900  | -3.26016700 | 1.47734000  |
| O  | 3.24492100  | -0.97077400 | 3.12643600  |
| O  | 4.54045200  | -1.52768100 | 2.66299900  |
| O  | 4.57799500  | -1.96692000 | -0.00373900 |
| O  | 3.39200500  | -1.45757100 | -0.71216300 |
| O  | 1.68050000  | 0.63287900  | -1.12366200 |
| O  | 3.58166600  | 2.65426400  | -1.42659700 |
| O  | 3.48551600  | 0.26803700  | -3.07308200 |
| O  | 4.88768600  | 0.36702900  | -2.59559700 |
| O  | 5.04248600  | 0.77206400  | 0.07011500  |
| O  | 3.74882200  | 0.68161900  | 0.76737400  |
| O  | -0.14044900 | 1.38690700  | 0.71840100  |
| W  | 3.15053200  | -1.64997500 | 1.29471000  |
| W  | 3.60207000  | 0.94233800  | -1.24127300 |
| O  | -0.48353100 | -0.88272800 | -0.72231600 |
| O  | -2.43283200 | -2.65122500 | 0.03665900  |
| O  | -2.02978300 | -1.21306400 | -2.72532500 |
| O  | -3.46951000 | -1.22820700 | -2.41457000 |
| O  | -4.79761300 | -1.26923600 | -0.22112500 |
| O  | -2.68952400 | 0.28652700  | 0.30231100  |
| O  | -1.11762600 | 3.95714400  | 1.00734200  |
| O  | -2.14039800 | 1.80521500  | 2.56484200  |
| O  | -3.31919400 | 2.49121500  | 1.98761300  |
| O  | -3.05889600 | 2.87839400  | -0.73158200 |
| O  | -1.77896500 | 2.37771200  | -1.27923900 |
| W  | -2.41961600 | -1.11195900 | -0.77708600 |
| W  | -1.81758300 | 2.40819900  | 0.70043100  |
| Si | 0.60060800  | 0.11071500  | 0.00886400  |
| C  | -6.82203100 | -2.05359400 | -1.80181900 |
| H  | -7.42308500 | -1.26188000 | -1.35029600 |
| H  | -7.43813100 | -2.91932900 | -2.05660800 |
| H  | -6.30193100 | -1.68927400 | -2.68875100 |
| S  | -5.53546800 | -2.59151500 | -0.63816700 |
| C  | -6.56985200 | -2.99834100 | 0.79711100  |
| H  | -5.89238500 | -3.27449700 | 1.60644300  |
| H  | -7.17318700 | -2.13180000 | 1.07426900  |
| H  | -7.20153600 | -3.84917000 | 0.53109300  |
| O  | -6.05380900 | 0.80645600  | 1.03910500  |
| O  | -5.42337400 | 0.83023800  | 2.35230600  |
| H  | -4.62887500 | 1.40102700  | 2.17951100  |
| H  | -5.57616200 | 0.06003500  | 0.59804700  |

### H-TS2



|    |             |             |             |
|----|-------------|-------------|-------------|
| O  | 1.51995800  | -0.75727800 | 1.17573500  |
| O  | 2.71270300  | -3.26834600 | 1.44635700  |
| O  | 3.38322300  | -0.97589400 | 3.09393000  |
| O  | 4.67791000  | -1.50300900 | 2.59552000  |
| O  | 4.65760000  | -1.92182700 | -0.07601300 |
| O  | 3.44366200  | -1.42924700 | -0.74787700 |
| O  | 1.68115400  | 0.64444100  | -1.09126200 |
| O  | 3.54488700  | 2.69249100  | -1.43555600 |
| O  | 3.44033700  | 0.31353200  | -3.09196500 |
| O  | 4.85359600  | 0.43447200  | -2.65444300 |
| O  | 5.07461500  | 0.82313700  | 0.01021100  |
| O  | 3.80099300  | 0.70479300  | 0.73947400  |
| O  | -0.13806600 | 1.30637000  | 0.80023100  |
| W  | 3.25872300  | -1.64615400 | 1.26141700  |
| W  | 3.59840200  | 0.98068400  | -1.26140600 |
| O  | -0.43226400 | -0.94138600 | -0.66751800 |
| O  | -2.52418400 | -2.73001300 | -0.12028700 |
| O  | -2.10552900 | -0.95602300 | -2.69111500 |
| O  | -3.52483000 | -0.91355000 | -2.25486500 |
| O  | -5.08995400 | -1.28469400 | -0.08579000 |
| O  | -2.67448800 | 0.11371200  | 0.52377100  |
| O  | -1.15679300 | 3.88724300  | 0.86111400  |
| O  | -2.10504800 | 1.84738400  | 2.63647700  |
| O  | -3.30891200 | 2.46374400  | 2.03272600  |
| O  | -3.11211200 | 2.59184600  | -0.71427900 |
| O  | -1.84528300 | 2.03399000  | -1.23185000 |
| W  | -2.35335400 | -1.11103900 | -0.72469800 |
| W  | -1.83035900 | 2.30433300  | 0.73063000  |
| Si | 0.64880100  | 0.07759000  | 0.05749800  |
| C  | -6.91454000 | -1.66461200 | -2.03153600 |
| H  | -7.51792100 | -0.87454400 | -1.57902800 |
| H  | -7.54719000 | -2.43240200 | -2.48372300 |
| H  | -6.23141900 | -1.25271300 | -2.77573400 |
| S  | -5.87346300 | -2.44558600 | -0.75904200 |
| C  | -7.17600000 | -2.90178700 | 0.42746100  |
| H  | -6.67746600 | -3.33359500 | 1.29681400  |
| H  | -7.74132900 | -2.01104600 | 0.71007100  |
| H  | -7.82403000 | -3.64719800 | -0.03989300 |
| O  | -6.14746500 | 0.82724300  | 1.23440600  |
| O  | -5.43453600 | 0.81247800  | 2.50538300  |
| H  | -4.63702600 | 1.36136300  | 2.29308200  |
| H  | -5.75016700 | 0.04791400  | 0.76266000  |

#### H-INT4

|   |             |             |             |
|---|-------------|-------------|-------------|
| O | 1.71815100  | -0.98373600 | 1.03936900  |
| O | 3.15565800  | -3.37299600 | 1.01149100  |
| O | 3.61826700  | -1.24187600 | 2.92365300  |
| O | 4.95281300  | -1.57668100 | 2.36821800  |
| O | 4.94589900  | -1.66852800 | -0.33454000 |
| O | 3.68320100  | -1.21160300 | -0.93887100 |
| O | 1.72972500  | 0.74021000  | -1.00734100 |
| O | 3.41736200  | 2.96278800  | -1.10879300 |
| O | 3.48744900  | 0.80159100  | -3.04122700 |
| O | 4.89108700  | 0.98756100  | -2.59608600 |
| O | 5.10887100  | 1.06583100  | 0.09911800  |
| O | 3.85628500  | 0.74756600  | 0.80437600  |
| O | -0.09429700 | 0.98166300  | 0.99387700  |

|    |             |             |             |
|----|-------------|-------------|-------------|
| W  | 3.54200000  | -1.69610700 | 1.02448300  |
| W  | 3.61380900  | 1.25351700  | -1.14436600 |
| O  | -0.27409700 | -1.02311900 | -0.78186100 |
| O  | -2.39152600 | -2.91364200 | -0.36061800 |
| O  | -2.29229500 | -0.97109700 | -2.71099100 |
| O  | -3.60462800 | -0.86080400 | -1.99691900 |
| O  | -6.60266800 | -1.43062500 | 0.40582600  |
| O  | -2.59535600 | -0.31535700 | 0.73368400  |
| O  | -1.18530300 | 3.53760400  | 0.86997200  |
| O  | -2.07188100 | 1.57232300  | 2.78696000  |
| O  | -3.29669900 | 2.11784600  | 2.15445100  |
| O  | -3.09361800 | 2.06850000  | -0.59558100 |
| O  | -1.83918900 | 1.45540700  | -1.06747400 |
| W  | -2.18267000 | -1.23469100 | -0.73603500 |
| W  | -1.81028000 | 1.93252900  | 0.87075000  |
| Si | 0.77816400  | -0.05499800 | 0.06748700  |
| C  | -6.87851300 | -0.32942500 | -2.04786900 |
| H  | -7.14892300 | 0.61319200  | -1.56603600 |
| H  | -7.42213500 | -0.45775200 | -2.98737600 |
| H  | -5.80222400 | -0.38459700 | -2.22408600 |
| S  | -7.29732200 | -1.71850800 | -0.94754100 |
| C  | -9.06416000 | -1.34482100 | -0.70006400 |
| H  | -9.44804500 | -2.07481800 | 0.01458700  |
| H  | -9.17230900 | -0.33032900 | -0.30933700 |
| H  | -9.58099600 | -1.45367800 | -1.65698900 |
| O  | -6.41781600 | 0.85508600  | 1.83805400  |
| O  | -5.41142800 | 0.48633100  | 2.82735800  |
| H  | -4.62867700 | 1.00297600  | 2.51401900  |
| H  | -6.48107400 | 0.02624400  | 1.29230100  |

#### H-INT5

|   |             |             |             |
|---|-------------|-------------|-------------|
| O | -1.14750400 | -1.18403500 | -0.86937600 |
| O | -2.87908100 | -3.33263900 | -0.45720900 |
| O | -2.99139900 | -1.59383300 | -2.77754900 |
| O | -4.37845000 | -1.65651300 | -2.25436100 |
| O | -4.49039300 | -1.19293900 | 0.40744400  |
| O | -3.20545200 | -0.77421700 | 0.99142100  |
| O | -1.02628400 | 0.89800000  | 0.80920700  |
| O | -2.40680100 | 3.28298100  | 0.35215700  |
| O | -2.83919400 | 1.59007600  | 2.66647900  |
| O | -4.18773500 | 1.84651000  | 2.10253000  |
| O | -4.28617300 | 1.39727400  | -0.56390400 |
| O | -3.05809700 | 0.79467600  | -1.10873800 |
| O | 0.89791400  | 0.52661900  | -1.07854900 |
| W | -3.04915400 | -1.66052400 | -0.82590200 |
| W | -2.83051200 | 1.65509300  | 0.71379800  |
| O | 0.75571100  | -1.09302200 | 1.04024100  |
| O | 2.78915300  | -3.07035200 | 1.39322400  |
| O | 2.46554700  | -0.65275600 | 3.17095700  |
| O | 3.87448200  | -0.75908100 | 2.67954400  |
| O | 3.31510800  | -0.83840600 | -0.26865500 |
| O | 2.12597600  | 3.02095800  | -1.30218400 |
| O | 3.01260600  | 0.68322600  | -2.74398500 |
| O | 4.22885300  | 1.27821700  | -2.13618700 |
| O | 3.80359200  | 1.73779100  | 0.57168300  |
| O | 2.47494100  | 1.28726500  | 1.02162000  |
| W | 2.63451800  | -1.34985200 | 1.31794800  |

|    |             |             |             |
|----|-------------|-------------|-------------|
| W  | 2.64035300  | 1.41568400  | -0.96411500 |
| Si | -0.14317400 | -0.19641100 | -0.03343800 |
| O  | 5.91079200  | -1.29141100 | -1.01042400 |
| O  | 5.79961200  | -0.95170000 | -2.42519800 |
| H  | 5.33274400  | -0.08147200 | -2.37794800 |
| H  | 4.96471700  | -1.26004100 | -0.72332800 |

**H-INT6**

|    |             |             |             |
|----|-------------|-------------|-------------|
| O  | 1.20595100  | -1.16191000 | 0.85270400  |
| O  | 2.99919500  | -3.27512600 | 0.54319000  |
| O  | 3.05884400  | -1.42472200 | 2.77855500  |
| O  | 4.44757800  | -1.47284800 | 2.25824600  |
| O  | 4.55120300  | -1.13153400 | -0.41863200 |
| O  | 3.25673600  | -0.78537800 | -1.02801500 |
| O  | 1.02517700  | 0.80592000  | -0.95219900 |
| O  | 2.31448600  | 3.26160200  | -0.60825700 |
| O  | 2.82768600  | 1.46756700  | -2.82859100 |
| O  | 4.16108000  | 1.80366900  | -2.27067000 |
| O  | 4.25575700  | 1.49678400  | 0.41468000  |
| O  | 3.04714800  | 0.88161200  | 0.98751300  |
| O  | -0.79857500 | 0.60055300  | 1.05415500  |
| W  | 3.12003900  | -1.58321400 | 0.83214400  |
| W  | 2.80105600  | 1.63389300  | -0.88225900 |
| O  | -0.79578200 | -1.16578400 | -0.95260000 |
| O  | -2.75947700 | -3.24861400 | -0.90616000 |
| O  | -2.76177700 | -0.99366100 | -2.90940900 |
| O  | -4.09752500 | -1.08281800 | -2.23729100 |
| O  | -3.22442200 | -0.88783000 | 0.59291900  |
| O  | -2.10590500 | 3.06085600  | 1.20663200  |
| O  | -2.76665900 | 0.79933000  | 2.88762300  |
| O  | -4.04998600 | 1.27816600  | 2.32079000  |
| O  | -3.90191400 | 1.60162100  | -0.41458800 |
| O  | -2.60761400 | 1.14262600  | -0.94637100 |
| W  | -2.67760700 | -1.52363100 | -0.99816600 |
| W  | -2.58258200 | 1.41606000  | 1.03995500  |
| Si | 0.17075600  | -0.21217900 | 0.00895600  |
| O  | -6.02449100 | -1.00364800 | 0.48833700  |
| O  | -6.34251000 | 0.36341300  | 0.08720000  |
| H  | -5.50682100 | 0.66804000  | -0.33701100 |
| H  | -5.10442200 | -0.92631300 | 0.82961900  |

**H-TS3**

|   |             |             |             |
|---|-------------|-------------|-------------|
| O | 0.90528300  | -0.80064000 | 0.85292700  |
| O | 2.19601600  | -3.27703500 | 0.76296000  |
| O | 2.53317500  | -1.35823900 | 2.91204100  |
| O | 3.90618500  | -1.72866100 | 2.48778700  |
| O | 4.23288700  | -1.58430600 | -0.18912500 |
| O | 3.08345500  | -1.00597700 | -0.90464400 |
| O | 1.25383900  | 1.02156700  | -1.06564700 |
| O | 3.01557400  | 3.16189800  | -0.73522400 |
| O | 3.26082100  | 1.17566200  | -2.83626200 |
| O | 4.59946400  | 1.25049500  | -2.20016500 |
| O | 4.47236700  | 1.09227000  | 0.49335500  |
| O | 3.12983400  | 0.78500900  | 1.01349700  |
| O | -0.78057100 | 1.29969700  | 0.66777300  |
| W | 2.66817600  | -1.63595100 | 0.98135600  |
| W | 3.15421200  | 1.45405100  | -0.90391100 |

|    |             |             |             |
|----|-------------|-------------|-------------|
| O  | -0.85098600 | -0.61093500 | -1.21185400 |
| O  | -2.32492500 | -2.96632900 | -1.07232400 |
| O  | -2.71758500 | -0.73795800 | -2.98679800 |
| O  | -4.02575600 | -1.13473100 | -2.46244300 |
| O  | -2.66716700 | -0.74234500 | 0.77673500  |
| O  | -2.67298000 | 3.26123700  | 1.02134400  |
| O  | -2.30020300 | 1.12837600  | 2.92350000  |
| O  | -3.75496500 | 1.16647000  | 2.63681000  |
| O  | -4.32451200 | 1.27981200  | -0.04189800 |
| O  | -3.14253500 | 1.13924400  | -0.91202800 |
| W  | -2.67382300 | -1.27837900 | -1.08529700 |
| W  | -2.68266600 | 1.53666400  | 1.04924800  |
| Si | 0.12728400  | 0.21977200  | -0.17605700 |
| O  | -4.58983500 | -1.74832800 | 0.08615300  |
| O  | -5.80454200 | -0.99829900 | -0.16938500 |
| H  | -5.45409800 | -0.07318700 | -0.18900100 |
| H  | -3.86313400 | -1.19980100 | 0.81377800  |

#### H-INT7

|    |             |             |             |
|----|-------------|-------------|-------------|
| O  | 0.94565100  | -0.60303600 | 1.05259100  |
| O  | 2.14270400  | -3.12212900 | 1.19923600  |
| O  | 2.69869600  | -0.96132000 | 3.05383700  |
| O  | 4.02456000  | -1.44047000 | 2.58947700  |
| O  | 4.15426900  | -1.65155400 | -0.10515400 |
| O  | 2.97496400  | -1.11157300 | -0.80221300 |
| O  | 1.21392900  | 0.98126700  | -1.07302800 |
| O  | 3.07883500  | 3.05332100  | -1.15545000 |
| O  | 3.07905200  | 0.81079600  | -2.99685700 |
| O  | 4.46590600  | 0.90283000  | -2.47566600 |
| O  | 4.54383800  | 1.08239200  | 0.21773000  |
| O  | 3.23373000  | 0.90179300  | 0.86648500  |
| O  | -0.79603800 | 1.41339000  | 0.65006400  |
| W  | 2.68199900  | -1.48715800 | 1.17092400  |
| W  | 3.13344100  | 1.33271500  | -1.11317000 |
| O  | -0.86094600 | -0.70245400 | -0.98328300 |
| O  | -2.32599600 | -3.05446500 | -0.89936800 |
| O  | -2.47730200 | -0.96251800 | -2.90318900 |
| O  | -3.86589200 | -1.27900700 | -2.58085800 |
| O  | -2.53470700 | -0.76643400 | 0.95347100  |
| O  | -2.75728200 | 3.33904200  | 0.90090400  |
| O  | -2.29014500 | 1.33204700  | 2.91642100  |
| O  | -3.74373800 | 1.25471100  | 2.62808500  |
| O  | -4.31675600 | 1.20896500  | -0.01783900 |
| O  | -3.13538500 | 1.00813400  | -0.87799600 |
| W  | -2.72083600 | -1.38259700 | -1.00609100 |
| W  | -2.69077800 | 1.62380700  | 1.02604600  |
| Si | 0.11517300  | 0.25108500  | -0.08629000 |
| O  | -4.55378200 | -1.68355500 | -0.13523000 |
| O  | -5.72307600 | -1.04737800 | -0.70747700 |
| H  | -5.54234600 | -0.11571300 | -0.45887400 |
| H  | -3.35387500 | -1.04263900 | 1.39890900  |

#### H-INT8

|   |             |             |             |
|---|-------------|-------------|-------------|
| O | -1.14055800 | -0.82094100 | -1.16876300 |
| O | -2.65657100 | -3.16199700 | -1.11285300 |
| O | -3.11376500 | -0.98898100 | -2.98123900 |
| O | -4.43745800 | -1.28236300 | -2.37760600 |

|    |             |             |             |
|----|-------------|-------------|-------------|
| O  | -4.33207900 | -1.41301600 | 0.32054000  |
| O  | -3.03073200 | -1.01738900 | 0.88566800  |
| O  | -0.99779000 | 0.84575500  | 0.91082600  |
| O  | -2.57952400 | 3.13643000  | 1.10580900  |
| O  | -2.66570300 | 0.95183500  | 3.01284100  |
| O  | -4.07673600 | 1.20194800  | 2.62540800  |
| O  | -4.39949900 | 1.33332500  | -0.05460600 |
| O  | -3.19273800 | 0.97497600  | -0.81888600 |
| O  | 0.81921100  | 0.99442000  | -1.08571800 |
| W  | -2.98072200 | -1.47092400 | -1.09071200 |
| W  | -2.84577200 | 1.43549700  | 1.12709500  |
| O  | 0.87853400  | -1.06863000 | 0.59914600  |
| O  | 2.66180100  | -3.09710200 | 0.94242800  |
| O  | 2.08555500  | -0.95555000 | 2.83408500  |
| O  | 3.54106800  | -1.08403400 | 2.85255600  |
| O  | 3.00303800  | -0.84682300 | -0.93163600 |
| O  | 2.39376800  | 3.26986300  | -1.03418200 |
| O  | 2.69972700  | 1.15746000  | -3.00053500 |
| O  | 4.06075500  | 1.43458200  | -2.47598600 |
| O  | 4.10816600  | 1.43487400  | 0.23727500  |
| O  | 2.83743600  | 1.02375400  | 0.86079900  |
| W  | 2.79004400  | -1.38510800 | 1.06390100  |
| W  | 2.68236400  | 1.57461500  | -1.09399000 |
| Si | -0.10461900 | -0.01887300 | -0.16983500 |
| O  | 4.79136500  | -1.31500000 | 0.84349000  |
| O  | 5.32778200  | -1.76318100 | -0.43137700 |
| H  | 4.63295400  | -1.41541600 | -1.04144200 |
| H  | 2.35359400  | -1.27600200 | -1.50648300 |

#### H-TS4

|   |             |             |             |
|---|-------------|-------------|-------------|
| O | -1.07731800 | -0.27654400 | -1.44968400 |
| O | -2.36328800 | -2.72395000 | -1.86562200 |
| O | -3.14729100 | -0.24563300 | -3.15730900 |
| O | -4.39320800 | -0.81004100 | -2.58126800 |
| O | -4.08465700 | -1.52895800 | 0.01297200  |
| O | -2.78855600 | -1.13386200 | 0.58908600  |
| O | -0.94426400 | 0.90492800  | 0.94641900  |
| O | -2.72753900 | 2.89340400  | 1.74057900  |
| O | -2.46790500 | 0.33711900  | 3.08782800  |
| O | -3.91964600 | 0.51426200  | 2.83724600  |
| O | -4.44320200 | 1.20681900  | 0.27856500  |
| O | -3.26225400 | 1.15992800  | -0.60090200 |
| O | 0.94415200  | 1.40061200  | -0.92763500 |
| W | -2.84172000 | -1.12632100 | -1.43930100 |
| W | -2.82724100 | 1.21376700  | 1.37871000  |
| O | 0.83923900  | -0.99013600 | 0.28675300  |
| O | 2.04231900  | -3.40530300 | 0.68466800  |
| O | 1.97766200  | -1.46128400 | 2.74993600  |
| O | 3.42335900  | -1.76806900 | 2.63509600  |
| O | 2.99626300  | -0.26026800 | -1.64767900 |
| O | 2.68104900  | 3.22924800  | 0.15651900  |
| O | 2.89884900  | 2.42746300  | -2.56994100 |
| O | 4.26355300  | 2.29562600  | -2.00139900 |
| O | 4.27127000  | 0.95158300  | 0.40469700  |
| O | 2.96646400  | 0.51683100  | 0.91928600  |
| W | 2.47784800  | -1.75698000 | 0.92006500  |
| W | 2.88134800  | 1.75122100  | -0.72749900 |

|    |             |             |             |
|----|-------------|-------------|-------------|
| Si | -0.05731800 | 0.27987300  | -0.28689300 |
| O  | 4.32563200  | -1.90507900 | 0.30225000  |
| O  | 4.19561400  | -2.33883000 | -1.07989700 |
| H  | 3.80361900  | -1.46371900 | -1.48894900 |
| H  | 2.27110600  | -0.41829800 | -2.26517000 |

**H-INT9**

|    |             |             |             |
|----|-------------|-------------|-------------|
| O  | 0.95342500  | 0.57604300  | -1.20333200 |
| O  | 2.45473300  | 2.87605200  | -1.70144700 |
| O  | 2.79984600  | 0.38064100  | -3.14070900 |
| O  | 4.15893500  | 0.77877600  | -2.69661500 |
| O  | 4.23270300  | 1.42636900  | -0.07306800 |
| O  | 2.97598500  | 1.15352300  | 0.64473600  |
| O  | 0.96918600  | -0.65543800 | 1.16945100  |
| O  | 2.57566400  | -2.87765900 | 1.68864900  |
| O  | 2.78198800  | -0.36799700 | 3.13134400  |
| O  | 4.16402800  | -0.69972800 | 2.70312100  |
| O  | 4.29809900  | -1.34108800 | 0.08013200  |
| O  | 3.03794500  | -1.12877400 | -0.65127000 |
| O  | -0.89130200 | -1.27660400 | -0.67467300 |
| W  | 2.78947100  | 1.21899900  | -1.37474900 |
| W  | 2.83224300  | -1.20604000 | 1.36598100  |
| O  | -0.94932700 | 1.11510700  | 0.62404300  |
| O  | -2.16124900 | 3.61263900  | 1.10249300  |
| O  | -2.75341700 | 1.28250200  | 2.65528200  |
| O  | -4.06558000 | 1.78130500  | 2.17939600  |
| O  | -3.02258700 | -0.33273700 | -2.35011600 |
| O  | -2.51827900 | -3.16881100 | 0.63348900  |
| O  | -2.26363100 | -2.98854100 | -2.23870700 |
| O  | -3.71421300 | -3.02793800 | -1.93124300 |
| O  | -4.38583100 | -1.10763200 | -0.04860200 |
| O  | -3.19985400 | -0.39265400 | 0.46372300  |
| W  | -2.67785400 | 1.99730500  | 0.82540500  |
| W  | -2.71268900 | -1.99045800 | -0.60759900 |
| Si | -0.00041700 | -0.05876000 | -0.02060800 |
| O  | -4.11662200 | 2.26322700  | -0.47150600 |
| O  | -2.84017200 | 2.01755700  | -1.17462300 |
| H  | -2.96465900 | 0.58064400  | -1.95191700 |
| H  | -2.29990700 | -0.40887300 | -2.98800300 |
